1           **A real-time colorimetric reverse transcription loop-mediated isothermal**  
2           **amplification (RT-LAMP) assay for the rapid detection of highly pathogenic H5**  
3                           **clade 2.3.4.4b avian influenza viruses**

4           **Fabien Filaire<sup>1,2</sup>, Aurélie Sécula<sup>1</sup>, Laetitia Lebre<sup>1</sup>, Guillaume Croville<sup>1</sup>, Jean-Luc Guerin<sup>1\*</sup>**

5           <sup>1</sup>UMR IHAP, ENVT, INRAE, Université de Toulouse, 31300 Toulouse, France.

6           <sup>2</sup>THESEO France, LanXess Biosecurity, LanXess Group, 53000 Laval, France.

7

8           \* **Correspondence:** Jean-Luc Guerin ; [jean-luc.guerin@envt.fr](mailto:jean-luc.guerin@envt.fr)

9           **Keywords:** RT-LAMP, highly pathogenic avian influenza virus, clade 2.3.4.4b molecular detection,  
10           clinical diagnostic, field detection.

11

12           **Abstract**

13           Highly pathogenic avian influenza viruses (HPAIV) are a major threat to the global poultry industry  
14           and public health due to their zoonotic potential. Since 2016, Europe and France have faced major  
15           epizootics caused by clade 2.3.4.4b H5 HPAIV. To reduce sample-to-result times, point-of-care testing  
16           is urgently needed to help prevent further outbreaks and the propagation of the virus. This study  
17           presents the design of a novel real-time colorimetric reverse transcription loop-mediated isothermal  
18           amplification (RT-LAMP) assay for the detection of clade 2.3.4.4b H5 HPAIV. A clinical validation  
19           of this RT-LAMP assay was performed on 198 pools of clinical swabs sampled in 52 poultry flocks  
20           during the H5 HPAI 2020-2022 epizootics in France. This RT-LAMP assay allowed the specific  
21           detection of HPAIV H5Nx clade 2.3.4.4b within 30 minutes with a sensitivity of 86.11%. This rapid,  
22           easy-to-perform, inexpensive, molecular detection assay could be included in the HPAIV surveillance  
23           toolbox.

24

## 25 **Introduction**

26 Avian influenza viruses (AIV) are enveloped negative-sense segmented single-stranded RNA viruses  
27 belonging to the *Orthomyxoviridae* family. AIV are commonly classified into subtypes based on the  
28 combination of their surface glycoproteins, hemagglutinin (HA) and neuraminidase (NA) (Wahlgren,  
29 2011). Importantly, AIV also can be differentiated by their pathogenicity: low pathogenic avian  
30 influenza viruses (LPAIV) and highly pathogenic avian influenza viruses (HPAIV). LPAIV are the  
31 most predominant worldwide and cause no to mild symptoms in infected individuals (Germeraad *et*  
32 *al.*, 2019; Jourdain *et al.*, 2010). Most of the time, LPAIV are undetected in flocks. However, due to  
33 genetic changes, H5 and H7 HA sometimes can shift from low pathogenic to highly pathogenic forms  
34 (Abdelwhab *et al.*, 2013; Dupré *et al.*, 2021; Wahlgren, 2011). Unlike LPAIV, HPAIV induce severe  
35 disease associated with strong typical clinical signs and high mortality rates (Lean *et al.*, 2022).

36 HPAIV display a tremendous evolutionary potential, driven by mutations, indels and reassortments (D.  
37 Lee *et al.*, 2017; D. H. Lee *et al.*, 2021; L. Shi *et al.*, 2019). This property has led to the emergence of  
38 the A/goose/Guangdong/1996(Gs/GD) lineage. All subsequent viruses derived from this lineage have  
39 been classified into clades and subclades. Over the years, clade 2.3.4 has become dominant, and  
40 subclade 2.3.4.4b has been widely persistent in Eurasia since 2016 (W. Shi & Gao, 2021). Viruses  
41 belonging to clade 2.3.4.4b have led to major epizootics, mostly due to H5N8 subtypes from 2016/2017  
42 to 2020/2021, and then an H5N1 subtype in 2021/2022. HPAIV epizootics have caused the death of  
43 millions of wild and domestic birds, threatened public health due to zoonotic risks, and generated major  
44 economic losses to the poultry industry (Adlhoch *et al.*, 2022). In addition, HPAIV epizootics seem to  
45 be spreading more widely over time, with new territories infected worldwide.

46 HPAIV infections are characterized by a massive viral shedding in the early stages of the infection,  
47 especially in ducks (Gaide *et al.*, 2021; Vergne *et al.*, 2021), and a rapid spread of the disease. These  
48 findings raise numerous challenges for the control and the surveillance of the infection, especially

49 during epizootics. Despite the reinforcement of biosecurity measures since 2016 (Delpont *et al.*, 2021)  
50 and the application of new control measures by public authorities each year, the virus has acquired the  
51 ability to spread rapidly and uncontrollably (Guinat *et al.*, 2020; Lewis *et al.*, 2021; Vergne *et al.*,  
52 2021). New strategies for the early detection of HPAIV, therefore are needed to better control viral  
53 spread.

54 Currently, European and French official guidelines for HPAIV detection and surveillance require an  
55 rRT-PCR analysis on tracheal swabs (Nielsen *et al.*, 2021). Positive results for HPAIV systematically  
56 lead to the culling of entire poultry flocks. However, although rRT-PCR is considered as the gold  
57 standard for HPAIV detection based on its analytical sensitivity, this method is still rather expensive,  
58 time-consuming (~80 min), and requires sophisticated equipment that is difficult to transport and must  
59 be operated by trained staff. This ultimately reduces its in-field diagnosis potential and can delay the  
60 rapid response needed during an epizootic.

61 Easy-to-perform, fast, low-cost, low-tech, sensitive, and specific methods are needed to improve the  
62 rapidity of HPAIV detection and develop new strategies for HPAIV surveillance in the field. The loop-  
63 mediated isothermal amplification (LAMP) assay is a molecular biology technology that has been  
64 developed since 2000 (Notomi *et al.*, 2000). The LAMP assay is an end-point nucleic acid  
65 amplification method based on a DNA polymerase. The technology requires a set of 2 or 3 pairs of  
66 primers targeting 6 to 8 binding sites, making it highly specific. The fast and isothermal amplification  
67 (15-40 min) can be performed by standard transportable equipment such as a heat block or water bath.  
68 This, combined with user-friendly read-outs such as fluorescence, turbidity and even colorimetric  
69 changes, enables its utilization in a field point-of-care strategy. Overall, LAMP assays are inexpensive  
70 (~1.5 euros/reaction, for indication of magnitude only), rapid, easy-to-perform, and robust against the  
71 well-known PCR reaction inhibitors. For all of these reasons, LAMP assays have been largely  
72 developed for the detection of viruses (Golabi *et al.*, 2021; Padzil *et al.*, 2022; Vanhomwegen *et al.*,

73 2021). More importantly, the low-technology required and the possible lyophilization of reagents allow  
74 its utilization in remote locations where resources are scarce or non-existent (Howson *et al.*, 2017;  
75 Kumar *et al.*, 2021; Vanhomwegen *et al.*, 2021).

76 Our research focused on developing a real-time colorimetric reverse transcription LAMP (RT-LAMP)  
77 assay for the detection of H5 HPAIV clade 2.3.4.4b. We designed a primer set for the detection of H5  
78 HPAIV clade 2.3.4.4b, and assessed its sensitivity and specificity on eight different AIV subtypes and  
79 pathotypes, including viruses from diverse clades. Finally, we assessed the performance of this real-  
80 time colorimetric RT-LAMP assay on tracheal and cloacal swabs sampled in France during the  
81 2020/2021 and 2021/2022 H5 HPAIV epizootics.

## 82 **Materials and Methods**

83 **Primer design.** A set of 626 HA sequences from H5 HPAIV clade 2.3.4.4b HA available on GISAID  
84 up to 7 February 2022, via <https://gisaid.org> or from our laboratory, were aligned using Geneious Prime  
85 2021.2.2 (<https://www.geneious.com>). From this alignment, a consensus sequence with a 95% base  
86 identity threshold was extracted to target a 200 to 350 base-long region with low base diversity. Finally,  
87 a 308 base region was selected and passed through the PrimerExplorer V5 online tool for LAMP primer  
88 design. A set of primers was selected (Table 1) and their specificity was checked through a BLAST  
89 alignment with eight selected AIV subtypes (Table 2).

90 **Inclusivity and exclusivity.** The analytical inclusivity and exclusivity of the designed primers were  
91 tested *in silico*, by rRT-PCR and by our RT-LAMP assay, on eight different avian influenza subtype  
92 viruses available in our laboratory. The selection included three H5 HPAIV clade 2.3.4.4b, one H5  
93 HPAIV from the European lineage (not part of clade 2.3.4.4b) (Briand *et al.*, 2017) and four LPAIV  
94 (Table 2).

95 **RNA extraction.** Viral RNA was extracted using the magnetic bead-based ID Gene Mag Fast  
96 Extraction Kit (IDvet, Grabels, France) combined with the IDEAL 32 extraction robot (IDvet),  
97 following the manufacturer's instructions. The extracted RNA was stored at -20 °C before use.

98 **Colorimetric Real-time RT-LAMP.** RT-LAMP reactions were done using the WarmStart  
99 Colorimetric LAMP 2X Master Mix kit (M1800, NEB, Hitchin, UK) following the manufacturer's  
100 instructions. Briefly, a 25 µL reaction mix was prepared by mixing 12.5 µL of the WarmStart  
101 Colorimetric LAMP 2X Master Mix, 5 µL of the sample viral RNA, 5 µL nuclease free water and 2.5  
102 µL of a 10x primer solution mix prepared beforehand. The 10x primer solution mix was prepared with  
103 16 µM of each FIP/BIP, 2 µM of each B3/F3, and 4 µM of each LF/LB. The reaction mix was incubated  
104 at 65 °C for 30 min and the colour switch, from purple to yellow in case of positive reaction, was  
105 assessed with the naked eye.

106 **Real-time RT-qPCR.** Two quantitative RT-PCR were used in this study. A real-time quantitative RT-  
107 PCR (rRT-PCR) with the officially-approved IDvet M gene and H5/H7 one-step rRT-PCR kit (Idvet,  
108 <https://www.id-vet.com>) was used for clinical validation as the 'gold standard' molecular-based  
109 HPAIV detection method. All reactions were realized following the manufacturer's instructions. A  
110 second RT-qPCR was used for the limit of detection assay. Viral RNA absolute quantification was  
111 performed using the iTaq Universal SYBR green one-step kit (#1725150, Bio-rad). The H5 gene was  
112 targeted with HA H5N8<sub>HP</sub> primers (5'-GACCTCTGTTACCCAGGGAGCCT-3', 5'-  
113 GGACAAGCTGCGCTTACCCCT-3') (Bessière *et al.*, 2021). The absolute quantification was  
114 performed using a standard curve based on 10-fold serial dilution of a plasmid containing the H5 HA  
115 gene. RT-qPCR reaction and results analysis were performed on a LightCycler 96 instrument (Roche).

116 **Limit of detection assay.** To investigate the detection limit of this RT-LAMP assay, a viral RNA  
117 absolute quantification was performed. Two serial dilutions of extracted viral RNA from embryonated

118 eggs HPAIV H5N8 2020/2021 and HPAIV H5N1 2021/2022 amplification were realized. Each  
119 dilution was systematically analyzed by our RT-LAMP assay and the iTaq RT-qPCR.

120 **Clinical validation.** The designed real-time colorimetric RT-LAMP was tested for clinical use on  
121 swabs in an epizootic context. A total of 198 swabs pools, corresponding to 52 poultry flocks (32 duck,  
122 19 chicken, 1 quail flocks), was included in this validation (Supplementary Table 1). The pools  
123 consisted of a mix of five tracheal or cloacal swabs sampled in infected or suspected farms during the  
124 HPAIV H5N8 2020/2021 and HPAIV H5N1 2021/2022 epizootics in France. All samples were tested  
125 in accordance with the European guidelines for HPAIV diagnosis. First, the total RNA was extracted  
126 using the magnetic bead-based ID Gene Mag Fast Extraction Kit IDvet (<https://www.id-vet.com>)  
127 combined with the IDEAL 32 extraction robot (IDvet), following the manufacturer's instructions.  
128 Then, HPAIV H5Nx viral RNA detection was simultaneously performed by rRT-PCR with the IDgene  
129 H5/H7 one-step rRT-PCR kit and the real-time colorimetric RT-LAMP assay. To validate the  
130 feasibility of the protocol under field conditions, this clinical validation was performed by a non-trained  
131 member of staff.

## 132 **Results**

133 The designed RT-LAMP primers were analyzed *in silico* to confirm their complementarity to binding  
134 regions. Multiple alignments with publicly available HA sequences from different AIV subtypes,  
135 including HPAIV from different clades and LPAIV, were selected. The alignment revealed the high  
136 binding complementary to the targeted regions of the clade 2.3.4.4b H5 HPAIVs only. The overall  
137 binding complementary reaches a 97.64%, 100%, and 99.4% ratio for the HPAIV H5N8 2016/2017,  
138 2020/2021 and the HPAIV H5N1 2021/2022, respectively. However, for the non-clade 2.3.4.4b  
139 viruses, the overall complementary rates do not exceed 84.12% (Supplementary Table 2). This low  
140 binding affinity is theoretically not sufficient to allow amplification (26,27) (Figure 1). To investigate  
141 the analytical inclusivity and exclusivity of the different AIV subtypes, eight AIV from distinct

142 subtypes and pathotypes, available in our laboratory, were used (Table 2, Figures 1 and 2). All samples  
143 were analyzed using the RT-LAMP assay in parallel with the gold standard rRT-PCR targeting both  
144 the M, H5 and H7 genes as controls for the detection of viral RNA. The results showed a 100% (3/3)  
145 analytical reactivity for the detection of clade 2.3.4.4b H5 HPAIV. Additionally, the exclusivity test  
146 showed a 100% primer specificity as none of the non-H5 clade 2.3.4.4b viruses tested positive (Figure  
147 2). These results, associated with the *in silico* analysis, tend to confirm the specificity of the RT-LAMP  
148 assay for HPAIV H5Ny from clade 2.3.4.4b.

149 Furthermore, the RT-LAMP assay detection limit was investigated by absolute quantification of the  
150 viral RNA by the iTaq RT-PCR. Two separate 2-fold serial dilutions of HPAIV H5N8 2020/2021 and  
151 H5N1 2021/2022 viral RNA samples were analyzed by RT-LAMP assay, rRT-PCR and RT-qPCR  
152 (Supplementary Table 3). The results were globally similar for both viruses. Indeed, the lowest RNA  
153 concentrations testing positive with the RT-LAMP assay were 9.66 and 18.44 copy / $\mu$ L for the H5N8  
154 HP 2020/2021 and the H5N1 HP 2021/2022, respectively (Supplementary Table 3). These findings are  
155 in agreement with the expected detection limit of a RT-LAMP assay, usually ranging from 100 to 1000  
156 copies/reaction (Zhang *et al.*, 2020). Moreover, the rRT-PCR results indicate a shared limit of detection  
157 with a cycle threshold ( $C_t$ ) of around 30 for both viruses (Supplementary Table 3).

158 Finally, a clinical validation of this RT-LAMP assay was performed on clinical swabs sampled during  
159 the H5N8 HP 2020/2021 and H5N1 HP 2021/2022 epizootics in France. Following the European  
160 guidelines for HPAIV surveillance and detection, a total of 198 pools of five tracheal or cloacal swabs  
161 each, corresponding to 52 poultry flocks (32 duck, 19 chicken, 1 quail flocks) (Supplementary Table  
162 4), were analyzed simultaneously by rRT-PCR, considered the gold standard method, and by the RT-  
163 LAMP assay developed.

164 Firstly, the swabs were grouped, regardless of the flocks, based on their  $C_t$  values obtained by rRT-  
165 PCR to investigate the sensitivity and specificity of the RT-LAMP assay depending on the viral RNA  
166 loads. Therefore, samples were divided for into four categories:  $C_t < 25$ ,  $25 < C_t < 30$ ,  $C_t > 30$  and  $0 < C_t$   
167 (Supplementary Table 4). The results of the rRT-PCR and RT-LAMP showed a very good agreement  
168 for samples with  $C_t$ s below 30. Indeed, the RT-LAMP assay showed a 100% and 86.27% sensitivity  
169 for samples with  $C_t < 25$  and  $C_t$ s between 25 and 30, respectively. For  $C_t$  values above 30, the sensitivity  
170 decreased drastically to 18.18%. When all data were considered altogether without differentiation  
171 based on  $C_t$ s, the overall sensitivity and specificity reached 86.11% and 100%, respectively  
172 (Supplementary Table 4).

173 Secondly, the data were analyzed grouped by flocks. Our data regrouped a total of 52 flocks with  
174 between 1 and 9 swab pools. According to the HPAIV detection guidelines (Nielsen *et al.*, 2021), only  
175 one pool must be detected as positive to consider the whole flock positive. Based on this guidance,  
176 only five flocks showed result discrepancies between RT-LAMP and rRT-PCR assays (RT-LAMP  
177 assay negative while rRT-PCR positive) (Supplementary Table 1). In this context, data analysis showed  
178 a 90% sensitivity and 100% specificity for HPAIV detection in flocks. Interestingly, the five flocks  
179 with divergent results correspond to samples with RT-PCR  $C_t > 30$ .

## 180 **Discussion**

181 To improve the molecular detection of HPAIV circulating worldwide, this study aimed to develop a  
182 real-time colorimetric RT-LAMP assay. Taken together, our findings suggest that this new real-time  
183 colorimetric RT-LAMP assay may offer, in specific contexts and purposes, an alternative to the gold  
184 standard rRT-PCR for the detection of HPAIV from clade 2.3.4.4b provided the primers are regularly  
185 updated. The three couples of designed primers have shown to be highly specific to the clade 2.3.4.4b  
186 H5 HPAIV in both *in silico* and *in vitro*. However due to the multiplicity of primers binding to a total  
187 of 8 binding sites, a high primer-to-binding site complementarity is required. Even though a relative



188 difference of detection limit and sensitivity can be noted between distinct viruses (Table 2,  
189 Supplementary Table 3 and 4), this assay has proven to be very sensitive, with a detection threshold  
190 determined below 20 copy/  $\mu$ L. Previous knowledge of the circulating strains (i.e., obtained by  
191 sequencing in a context of diagnosis or surveillance) is highly recommended to avoid false negatives  
192 due to a lack of specificity. Following the HPAIV detection guidelines, RT-LAMP detection of the M  
193 gene could be performed simultaneously (Golabi *et al.*, 2021).

194 A clinical validation performed on 198 pools of clinical swabs sampled in 52 poultry flocks have shown  
195 an overall sensitivity of 86.11% with up to 100% for samples with  $C_t$  below 25. Moreover, even though  
196 both detection limit investigations done by RT-qPCR and the clinical assay showed suboptimal results  
197 for samples with  $C_t > 30$ , this does not seem to be a major limitation in the context of an HPAIV  
198 epizootic. Indeed, most HPAIV infections induce high viral shedding, even in the earliest stages of the  
199 infection, leading to high loads of viral RNA (Criado *et al.*, 2021; Filaire *et al.*, 2022; Germeraad *et*  
200 *al.*, 2019) especially in the respiratory tract (Gaide *et al.*, 2021). Therefore, low viral RNA loads,  
201 associated with  $C_t > 30$ , which corresponds to approximately less than 20 copies /  $\mu$ l (Table 2 and  
202 Supplementary Table 4), are infrequent in HPAIV-infected birds.

203 This 30 min colorimetric RT-LAMP reaction could be performed in the field for point-of-care  
204 application. Additionally, this strategy could be included in a workflow comprising fast lysis and  
205 extraction methods and environmental sampling methods for the rapid detection of new outbreaks  
206 directly on-farm, especially in a context of clinical suspicions, where viral RNA loads are the highest.  
207 Further validation by proficiency tests in reference laboratories would be required before  
208 implementation in official surveillance but in the principle, this rapid, easy-to-perform (even for non-  
209 trained staff), inexpensive, low-tech molecular detection assay could be included in the HPAIV  
210 surveillance toolbox and improve the response capacity during epizootics.

## 211 **Acknowledgement**

212 This study was performed in the framework of the Chaire de Biosécurité & Santé Aviaires, hosted by  
213 the National Veterinary College of Toulouse (ENVT) and funded by the Direction Generale de  
214 l'Alimentation, Ministère de l'Agriculture et de la Souveraineté Alimentaire, France. Fabien Filaire's  
215 PhD position is funded by Theseo France and Lanxess biosecurity from the Lanxess group. The funders  
216 had no role in study design, data collection and interpretation, or the decision to submit the work for  
217 publication. We would like to thank the farm holders for their collaboration with sampling of their  
218 flocks and show our gratitude to Sebastien Mathieu Soubies for comments and constructive criticism  
219 on an earlier version of the manuscript. Finally, all authors acknowledge GISAID contributors.

## 220 **Disclosure statement**

221 The authors declare no conflict of interest.

## 222 **References**

- 223 Abdelwhab, E. S. M., Veits, J., & Mettenleiter, T. C. (2013). Genetic changes that accompanied  
224 shifts of low pathogenic avian influenza viruses toward higher pathogenicity in poultry.  
225 *Virulence*, 4(6), 441–452. <https://doi.org/10.4161/viru.25710>
- 226 Adlhoch, C., Fusaro, A., Gonzales, J. L., Kuiken, T., Marangon, S., Niqueux, É., Staubach, C.,  
227 Terregino, C., Aznar, I., Muñoz, I., & Baldinelli, F. (2022). Avian influenza overview March –  
228 June 2022. *EFSA Journal*, 20(8):7415. <https://doi.org/10.2903/j.efsa.2022.7415>
- 229 Bessièrè, P., Figueroa, T., Coggon, A., Foret-Lucas, C., Houffschmitt, A., Fusade-Boyer, M., Dupré,  
230 G., Guérin, J.-L., Delverdier, M., & Volmer, R. (2021). Opposite outcomes of the within-host  
231 competition between highly and low pathogenic H5N8 avian influenza viruses in chickens  
232 compared to ducks. *Journal of Virology*, 96(1), e01366-21. <https://doi.org/10.1128/jvi.01366-21>
- 233 Briand, F. X., Schmitz, A., Ogor, K., Le Prioux, A., Guillou-Cloarec, C., Guillemoto, C., Allée, C.,  
234 Le Bras, M., Hirschaud, E., Quenault, H., Touzain, F., Cherbonnel-Pansart, M., Lemaitre, E.,  
235 Courtillon, C., Gares, H., Daniel, P., Fediaevsky, A., Massin, P., Blanchard, Y., ... Niqueux, E.  
236 (2017). Emerging highly pathogenic H5 avian influenza viruses in France during winter  
237 2015/16: Phylogenetic analyses and markers for zoonotic potential. *Eurosurveillance*, 22(9), 1–  
238 11. <https://doi.org/10.2807/1560-7917.ES.2017.22.9.30473>
- 239 Criado, M. F., Leyson, C. M., Youk, S., Deblois, S., Olivier, T., Killian, M. L., Torchetti, M. L.,  
240 Parris, D. J., Spackman, E., Kapczynski, D. R., Suarez, D. L., Swayne, D. E., & Pantin-  
241 jackwood, M. J. (2021). The Pathobiology of H7N3 Low and High Pathogenicity Avian  
242 Influenza Viruses from the United States Outbreak in 2020 Differs between Turkeys and

- 243 Chickens. *Viruses*, *13*(1851). <https://doi.org/10.3390/v13091851>
- 244 Delpont, M., Racicot, M., Durivage, A., Fornili, L., Guerin, J. L., Vaillancourt, J. P., & Paul, M. C.  
245 (2021). Determinants of biosecurity practices in French duck farms after a H5N8 Highly  
246 Pathogenic Avian Influenza epidemic: The effect of farmer knowledge, attitudes and personality  
247 traits. *Transboundary and Emerging Diseases*, *68*(1), 51–61. <https://doi.org/10.1111/tbed.13462>
- 248 Dupré, G., Hoede, C., Figueroa, T., Bessière, P., Bertagnoli, S., Ducatez, M., Gaspin, C., & Volmer,  
249 R. (2021). Phylodynamic study of the conserved RNA structure encompassing the  
250 hemagglutinin cleavage site encoding region of H5 and H7 low pathogenic avian influenza  
251 viruses. *Virus Evolution*, *7*(2), 1–16. <https://doi.org/10.1093/ve/veab093>
- 252 Filaire, F., Lebre, L., Foret-Lucas, C., Vergne, T., Daniel, P., Lelièvre, A., de Barros, A., Jbenyeni,  
253 A., Bolon, P., Paul, M., Croville, G., & Guérin, J.-L. (2022). Highly Pathogenic Avian Influenza  
254 A(H5N8) Clade 2.3.4.4b Virus in Dust Samples from Poultry Farms, France, 2021. *Emerging*  
255 *Infectious Diseases*, *28*(7), 1446–1450. <https://doi.org/10.3201/eid2807.212247>
- 256 Gaide, N., Foret-Lucas, C., Figueroa, T., Vergne, T., Lucas, M.-N., Robertet, L., Souvestre, M.,  
257 Croville, G., Le Loc'h, G., Delverdier, M., & Guérin, J.-L. (2021). Viral tropism and detection  
258 of clade 2.3.4.4b H5N8 highly pathogenic avian influenza viruses in feathers of ducks and  
259 geese. *Scientific Reports*, *11*: 5928. <https://doi.org/10.1038/s41598-021-85109-5>
- 260 Germeraad, E. A., Sanders, P., Hagenaars, T. J., de Jong, M. C. M., & Gonzales, J. L. (2019). Virus  
261 Shedding of Avian Influenza in Poultry : *Viruses*, *11*(9), 812. <https://doi.org/10.3390/v11090812>
- 262 Golabi, M., Flodrops, M., Grasland, B., Vinayaka, A. C., Quyen, T. L., Nguyen, T., Bang, D. D., &  
263 Wolff, A. (2021). Development of Reverse Transcription Loop-Mediated Isothermal  
264 Amplification Assay for Rapid and On-Site Detection of Avian Influenza Virus. *Frontiers in*  
265 *Cellular and Infection Microbiology*, *11*(April), 1–11.  
266 <https://doi.org/10.3389/fcimb.2021.652048>
- 267 Guinat, C., Comin, A., Kratzer, G., Durand, B., Delesalle, L., Delpont, M., Guérin, J. L., & Paul, M.  
268 C. (2020). Biosecurity risk factors for highly pathogenic avian influenza (H5N8) virus infection  
269 in duck farms, France. *Transboundary and Emerging Diseases*, *67*(6), 2961–2970.  
270 <https://doi.org/10.1111/tbed.13672>
- 271 Howson, E. L. A., Armson, B., Madi, M., Kasanga, C. J., Kandusi, S., Sallu, R., Chepkwony, E.,  
272 Siddle, A., Martin, P., Wood, J., Mioulet, V., King, D. P., Lembo, T., Cleaveland, S., & Fowler,  
273 V. L. (2017). Evaluation of Two Lyophilized Molecular Assays to Rapidly Detect Foot-and-  
274 Mouth Disease Virus Directly from Clinical Samples in Field Settings. *Transboundary and*  
275 *Emerging Diseases*, *64*(3), 861–871. <https://doi.org/10.1111/tbed.12451>
- 276 Jourdain, E., Gunnarsson, G., Wahlgren, J., Latorre-Margalef, N., Bröjer, C., Sahlin, S., Svensson,  
277 L., Waldenström, J., Lundkvist, Å., & Olsen, B. (2010). Influenza virus in a natural host, the  
278 mallard: Experimental infection data. *PLoS ONE*, *5*(1), e8935.  
279 <https://doi.org/10.1371/journal.pone.0008935>
- 280 Kumar, S., Sharma, S., Bhardwaj, N., Pande, V., Savargaonkar, D., & Anvikar, A. R. (2021).  
281 Advanced Lyophilised Loop Mediated Isothermal Amplification (L-LAMP) based point of care  
282 technique for the detection of dengue virus. *Journal of Virological Methods*, *293*(114168).

- 283 <https://doi.org/10.1016/j.jviromet.2021.114168>
- 284 Lean, F. Z. X., Núñez, A., Banyard, A. C., Reid, S. M., Brown, I. H., & Hansen, R. D. E. (2022).  
285 Gross pathology associated with highly pathogenic avian influenza H5N8 and H5N1 in naturally  
286 infected birds in the UK (2020–2021). *Veterinary Record*, *190*(1), e731.  
287 <https://doi.org/10.1002/vetr.731>
- 288 Lee, D., Bertran, K., Kwon, J., & Swayne, D. E. (2017). Emergence and Evolution of HPAI H5Nx  
289 Clade 2.3.4.4. *J Vet Sci*, *18*(51), 269–280. <https://doi.org/10.4142/jvs.2017.18.S1.269> JVS
- 290 Lee, D. H., Criado, M. F., & Swayne, D. E. (2021). Pathobiological origins and evolutionary history  
291 of highly pathogenic avian influenza viruses. *Cold Spring Harbor Perspectives in Medicine*,  
292 *11*(2), 1–22. <https://doi.org/10.1101/cshperspect.a038679>
- 293 Lewis, N. S., Banyard, A. C., Whittard, E., Karibayev, T., Al Kafagi, T., Chvala, I., Byrne, A.,  
294 Meruyert, S., King, J., Harder, T., Grund, C., Essen, S., Reid, S. M., Brouwer, A., Zinyakov, N.  
295 G., Tegzhanov, A., Irza, V., Pohlmann, A., Beer, M., ... Brown, I. H. (2021). Emergence and  
296 spread of novel H5N8, H5N5 and H5N1 clade 2.3.4.4 highly pathogenic avian influenza in  
297 2020. *Emerging Microbes and Infections*, *10*(1), 148–151.  
298 <https://doi.org/10.1080/22221751.2021.1872355>
- 299 Nielsen, S. S., Alvarez, J., Bicout, D. J., Calistri, P., Depner, K., Drewe, J. A., Garin-Bastuji, B.,  
300 Gonzales Rojas, J. L., Schmidt, C. G., Herskin, M., Michel, V., Miranda Chueca, M. Á.,  
301 Pasquali, P., Roberts, H. C., Sihvonen, L. H., Spoolder, H., Stahl, K., Calvo, A. V., Viltrop, A.,  
302 ... Aznar, I. (2021). Scientific Opinion on the assessment of the control measures of the  
303 category A diseases of Animal Health Law: Highly Pathogenic Avian Influenza. *EFSA Journal*,  
304 *19*(1), 1–78. <https://doi.org/10.2903/j.efsa.2021.6372>
- 305 Notomi, T., Okayama, H., Masubuchi, H., Yonekawa, T., Watanabe, K., Amino, N., & Hase, T.  
306 (2000). Loop-mediated isothermal amplification of DNA Tsugunori. *Nucleic Acids Research*,  
307 *28*(12), e63. <https://doi.org/10.1093/nar/28.12.e63>
- 308 Padzil, F., Mariatulqabtiah, A. R., Tan, W. S., Ho, K. L., Isa, N. M., Lau, H. Y., Abu, J., & Chuang,  
309 K. P. (2022). Loop-mediated isothermal amplification (Lamp) as a promising point-of-care  
310 diagnostic strategy in avian virus research. In *Animals* (Vol. 12, Issue 1, p. 76).  
311 <https://doi.org/10.3390/ani12010076>
- 312 Shi, L., Yu, X. wu, Yao, W., Yu, B. liang, He, L. kun, Gao, Y., Zhang, Y. xian, Tian, G. bin, Ping, J.  
313 hui, & Wang, X. rong. (2019). Development of a reverse-transcription loop-mediated isothermal  
314 amplification assay to detect avian influenza viruses in clinical specimens. *Journal of*  
315 *Integrative Agriculture*, *18*(7), 1428–1435. [https://doi.org/10.1016/S2095-3119\(19\)62700-0](https://doi.org/10.1016/S2095-3119(19)62700-0)
- 316 Shi, W., & Gao, G. F. (2021). Emerging H5N8 avian influenza viruses. *Science*, *372*(6544), 784–  
317 786. <https://doi.org/10.1126/science.abg6302>
- 318 Vanhomwegen, J., Kwasiborski, A., Diop, A., Boizeau, L., Hoinard, D., Vray, M., Bercion, R.,  
319 Ndiaye, B., Dublineau, A., Michiyuki, S., Manuguerra, J. C., Sauvage, V., Candotti, D., Seck,  
320 A., Laperche, S., & Shimakawa, Y. (2021). Development and clinical validation of loop-  
321 mediated isothermal amplification (LAMP) assay to diagnose high HBV DNA levels in  
322 resource-limited settings. *Clinical Microbiology and Infection*, *27*(12), 1858.e9-1858.e15.

323 <https://doi.org/10.1016/j.cmi.2021.03.014>

324 Vergne, T., Gubbins, S., Guinat, C., Bauzile, B., Delpont, M., Chakraborty, D., Gruson, H., Roche,  
325 B., Andraud, M., Paul, M., & Guérin, J. L. (2021). Inferring within-flock transmission dynamics  
326 of highly pathogenic avian influenza H5N8 virus in France, 2020. *Transboundary and Emerging*  
327 *Diseases*, 68(6), 3151–3155. <https://doi.org/10.1111/TBED.14202>

328 Wahlgren, J. (2011). Influenza A viruses: an ecology review. *Infection Ecology & Epidemiology*,  
329 1(1), 6004. <https://doi.org/10.3402/iee.v1i0.6004>

330 Zhang, S., Shin, J., Shin, S., & Chung, Y. J. (2020). Development of reverse transcription loop-  
331 mediated isothermal amplification assays for point-of-care testing of avian influenza virus  
332 subtype H5 and H9. *Genomics and Informatics*, 18(4), 1–8.  
333 <https://doi.org/10.5808/GI.2020.18.4.E40>

334

335



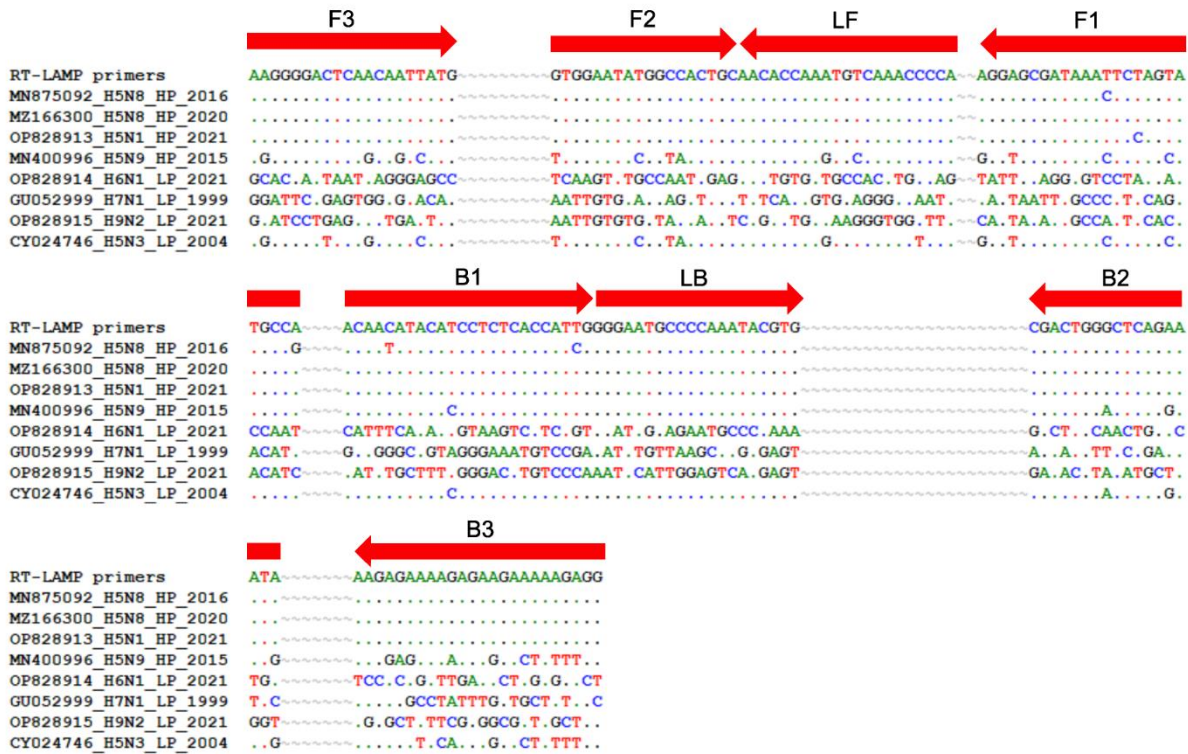

336  
 337 **Figure 1.** LAMP primers alignment to the sequence of the 8 AIV viruses included in the study.

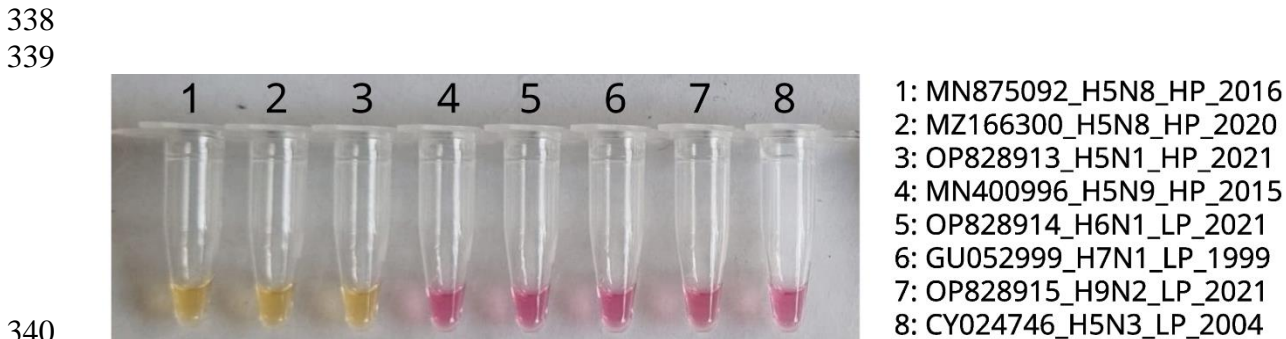

340  
 341 **Figure 2.** Real-time colorimetric LAMP results on different AIV viruses. Positive amplification  
 342 induces a colorimetric change from purple to yellow. 1, 2016/2017 H5N8 HP clade 2.3.4.4b virus. 2,  
 343 2020/2021 H5N8 HP clade 2.3.4.4b virus. 3, 2021/2022 H5N1 clade 2.3.4.4b virus. 4, H5N9 HP  
 344 none clade 2.3.4.4b virus. 5, H6N1 LP virus. 6, H7N1 LP virus. 7, H9N2 LP virus. 8, H5N3 LP  
 345 virus.

348 **Tables**

349 Table 1: List and sequences of the designed RT-LAMP primers. The nucleotide position corresponds  
 350 to the HA sequence of the HPAIV H5N8 2020/2021 (accession number MZ166300).

| Gene | Primer | Length<br>(bp) | Sequence (5' to 3')                              | Location on<br>H5 gene               |
|------|--------|----------------|--------------------------------------------------|--------------------------------------|
| HA   | F3     | 20             | AAGGGGACTCAACAATTATG                             | 824-843                              |
| HA   | B3     | 24             | CCTCTTTTTCTTCTCTTTTTCTCTT                        | 1014-1037                            |
| HA   | FIP    | 43             | TGGCATACTAGAATTTATCGCTCCT-<br>GTGGAATATGGCCACTGC | F1 (894-<br>918), F2<br>(853-870)    |
| HA   | BIP    | 42             | ACAACATACATCCTCTCACCATTG-<br>TATTTCTGAGCCCAGTCG  | B1(923-<br>946),<br>B2(989-<br>1006) |
| HA   | LPF    | 21             | TGGGGTTTGACATTTGGTGTT                            | 871-891                              |
| HA   | LPB    | 20             | GGGAATGCCCAAATACGTG                              | 947-966                              |

351

352 Table 2: Viruses selected to test the designed primer set

| Subtype | Pathogenic form | Clade 2.3.4.4b | Sampling location | Sampling time | Host        | Amplification    | Virus reference                           | Accession number |
|---------|-----------------|----------------|-------------------|---------------|-------------|------------------|-------------------------------------------|------------------|
| H5N8    | HP              | Yes            | France            | 2016          | Duck        | Embryonated eggs | A/mallard duck/France/171201g/2017 (H5N8) | MN875092         |
| H5N8    | HP              | Yes            | France            | 2020          | Duck        | Embryonated eggs | A/Mule_duck/France/20353/2020(H5N8)       | MZ166300         |
| H5N1    | HP              | Yes            | France            | 2021          | Duck        | Embryonated eggs | A/Mule_duck/France/21348/2021 (H5N1)      | OP828913         |
| H5N9    | HP              | No             | France            | 2015          | Guinea Fowl | Embryonated eggs | A/Guinea Fowl/France/129/2015(H5N9)       | MN400996         |
| H9N2    | LP              | No             | Tunisia           | 2021          | Chicken     | None             | A/Gallus gallus/Tunisia/20057/2020(H9N2)  | OP828915         |
| H6N1    | LP              | No             | France            | 2021          | Duck        | Embryonated eggs | A/Pekin_duck/France/21114/2021(H6N1)      | OP828914         |
| H7N1    | LP              | No             | Italy             | 1999          | Turkey      | Cells (MDCK)     | A/Turkey/Italy/977/1999/H7N1              | GU052999         |
| H5N3    | LP              | No             | Italy             | 2004          | Duck        | Embryonated eggs | A/duck/Italy/775/2004(H5N3)               | CY024746         |



354

### *Supplementary Material*

355

356 **Supplementary Table 1:** Summary of clinical sample information

357

| Flock ID | Sample ID | Animal species | Sampling year | Viral strain | Swab     | Ct    | LAMP | qPCR flock result | LAMP flock result |
|----------|-----------|----------------|---------------|--------------|----------|-------|------|-------------------|-------------------|
| #1       | #1.1      | Chicken        | 2020          | H5N8         | Cloacal  | 28.34 | Pos  | Pos               | Pos               |
|          | #1.2      | Chicken        | 2020          | H5N8         | Cloacal  | 29.78 | Pos  |                   |                   |
|          | #1.3      | Chicken        | 2020          | H5N8         | Tracheal | 20.38 | Pos  |                   |                   |
|          | #1.4      | Chicken        | 2020          | H5N8         | Tracheal | 20.50 | Pos  |                   |                   |
| #2       | #2.1      | Duck           | 2021          | H5N8         | Tracheal | 21.26 | Pos  | Pos               | Pos               |
|          | #2.2      | Duck           | 2021          | H5N8         | Tracheal | 24.10 | Pos  |                   |                   |
|          | #2.3      | Duck           | 2021          | H5N8         | Tracheal | 22.85 | Pos  |                   |                   |
|          | #2.4      | Duck           | 2021          | H5N8         | Tracheal | 24.70 | Pos  |                   |                   |
| #3       | #3.1      | Chicken        | 2021          | H5N8         | Tracheal | 21.94 | Pos  | Pos               | Pos               |
|          | #3.2      | Chicken        | 2021          | H5N8         | Tracheal | 22.64 | Pos  |                   |                   |
|          | #3.3      | Chicken        | 2021          | H5N8         | Tracheal | 21.78 | Pos  |                   |                   |
|          | #3.4      | Chicken        | 2021          | H5N8         | Tracheal | 23.21 | Pos  |                   |                   |
| #4       | #4.1      | Duck           | 2021          | H5N8         | Tracheal | 15.72 | Pos  | Pos               | Pos               |
|          | #4.2      | Duck           | 2021          | H5N8         | Tracheal | 19.59 | Pos  |                   |                   |
|          | #4.3      | Duck           | 2021          | H5N8         | Tracheal | 16.93 | Pos  |                   |                   |

|    |      |         |      |      |          |       |     |     |     |
|----|------|---------|------|------|----------|-------|-----|-----|-----|
|    | #4.4 | Duck    | 2021 | H5N8 | Tracheal | 20.27 | Pos |     |     |
| #5 | #5.1 | Duck    | 2021 | H5N8 | Tracheal | 18.73 | Pos | Pos | Pos |
|    | #5.2 | Duck    | 2021 | H5N8 | Tracheal | 23.31 | Pos |     |     |
|    | #5.3 | Duck    | 2021 | H5N8 | Tracheal | 23.43 | Pos |     |     |
|    | #5.4 | Duck    | 2021 | H5N8 | Tracheal | 24.32 | Pos |     |     |
| #6 | #6.1 | Chicken | 2021 | H5N8 | Tracheal | -     | Neg | Pos | Neg |
|    | #6.2 | Chicken | 2021 | H5N8 | Tracheal | 30.32 | Neg |     |     |
| #7 | #7.1 | Duck    | 2021 | H5N8 | Tracheal | 25.98 | Pos | Pos | Pos |
|    | #7.2 | Duck    | 2021 | H5N8 | Tracheal | 24.02 | Pos |     |     |
|    | #7.3 | Duck    | 2021 | H5N8 | Tracheal | 21.50 | Pos |     |     |
|    | #7.4 | Duck    | 2021 | H5N8 | Tracheal | 35.32 | Neg |     |     |
| #8 | #8.1 | Duck    | 2021 | H5N8 | Tracheal | 21.78 | Pos | Pos | Pos |
|    | #8.2 | Duck    | 2021 | H5N8 | Tracheal | 23.05 | Pos |     |     |
|    | #8.3 | Duck    | 2021 | H5N8 | Tracheal | 22.83 | Pos |     |     |
|    | #8.4 | Duck    | 2021 | H5N8 | Tracheal | 20.67 | Pos |     |     |
| #9 | #9.1 | Duck    | 2021 | H5N8 | Tracheal | 18.66 | Pos | Pos | Pos |
|    | #9.2 | Duck    | 2021 | H5N8 | Tracheal | 20.01 | Pos |     |     |
|    | #9.3 | Duck    | 2021 | H5N8 | Tracheal | 20.85 | Pos |     |     |
|    | #9.4 | Duck    | 2021 | H5N8 | Tracheal | 21.10 | Pos |     |     |
|    | #9.5 | Duck    | 2021 | H5N8 | Tracheal | 19.00 | Pos |     |     |
|    | #9.6 | Duck    | 2021 | H5N8 | Tracheal | 19.34 | Pos |     |     |

|     |       |      |      |      |          |       |     |     |     |
|-----|-------|------|------|------|----------|-------|-----|-----|-----|
|     | #9.7  | Duck | 2021 | H5N8 | Tracheal | 20.88 | Pos |     |     |
| #10 | #10.1 | Duck | 2021 | H5N8 | Tracheal | 34.93 | Neg | Pos | Neg |
|     | #10.2 | Duck | 2021 | H5N8 | Tracheal | 34.82 | Neg |     |     |
|     | #10.3 | Duck | 2021 | H5N8 | Tracheal | 34.26 | Neg |     |     |
|     | #10.4 | Duck | 2021 | H5N8 | Tracheal | -     | Neg |     |     |
| #11 | #11.1 | Duck | 2021 | H5N8 | Tracheal | 20.52 | Pos | Pos | Pos |
|     | #11.2 | Duck | 2021 | H5N8 | Tracheal | 20.91 | Pos |     |     |
|     | #11.3 | Duck | 2021 | H5N8 | Tracheal | 18.57 | Pos |     |     |
|     | #11.4 | Duck | 2021 | H5N8 | Tracheal | 20.64 | Pos |     |     |
| #12 | #12.1 | Duck | 2021 | H5N8 | Tracheal | 23.91 | Pos | Pos | Pos |
|     | #12.2 | Duck | 2021 | H5N8 | Tracheal | 24.11 | Pos |     |     |
|     | #12.3 | Duck | 2021 | H5N8 | Tracheal | 28.44 | Pos |     |     |
|     | #12.4 | Duck | 2021 | H5N8 | Tracheal | 23.53 | Pos |     |     |
| #13 | #13.1 | Duck | 2021 | H5N8 | Cloacal  | 25.27 | Pos | Pos | Pos |
|     | #13.2 | Duck | 2021 | H5N8 | Cloacal  | 23.38 | Pos |     |     |
|     | #13.3 | Duck | 2021 | H5N8 | Cloacal  | 28.51 | Pos |     |     |
|     | #13.4 | Duck | 2021 | H5N8 | Cloacal  | 24.82 | Pos |     |     |
| #14 | #14.1 | Duck | 2021 | H5N8 | Cloacal  | 28.46 | Pos | Pos | Pos |
|     | #14.2 | Duck | 2021 | H5N8 | Cloacal  | 35.54 | Pos |     |     |
|     | #14.3 | Duck | 2021 | H5N8 | Cloacal  | 22.07 | Pos |     |     |
|     | #14.4 | Duck | 2021 | H5N8 | Cloacal  | 35.20 | Neg |     |     |

|     |       |      |      |      |          |       |     |     |     |
|-----|-------|------|------|------|----------|-------|-----|-----|-----|
|     | #14.5 | Duck | 2021 | H5N8 | Tracheal | 26.48 | Pos |     |     |
|     | #14.6 | Duck | 2021 | H5N8 | Tracheal | 27.28 | Pos |     |     |
|     | #14.7 | Duck | 2021 | H5N8 | Tracheal | 23.46 | Pos |     |     |
|     | #14.8 | Duck | 2021 | H5N8 | Tracheal | 28.86 | Neg |     |     |
| #15 | #15.1 | Duck | 2021 | H5N8 | Tracheal | 25.06 | Pos | Pos | Pos |
|     | #15.2 | Duck | 2021 | H5N8 | Tracheal | 19.84 | Pos |     |     |
|     | #15.3 | Duck | 2021 | H5N8 | Tracheal | 22.40 | Pos |     |     |
|     | #15.4 | Duck | 2021 | H5N8 | Tracheal | 23.62 | Pos |     |     |
| #16 | #16.1 | Duck | 2021 | H5N8 | Tracheal | 20.92 | Pos | Pos | Pos |
|     | #16.2 | Duck | 2021 | H5N8 | Tracheal | 19.08 | Pos |     |     |
|     | #16.3 | Duck | 2021 | H5N8 | Tracheal | 22.70 | Pos |     |     |
|     | #16.4 | Duck | 2021 | H5N8 | Tracheal | 19.80 | Pos |     |     |
| #17 | #17.1 | Duck | 2021 | H5N8 | Cloacal  | 25.12 | Pos | Pos | Pos |
|     | #17.2 | Duck | 2021 | H5N8 | Cloacal  | 24.60 | Pos |     |     |
|     | #17.3 | Duck | 2021 | H5N8 | Cloacal  | 26.17 | Pos |     |     |
|     | #17.4 | Duck | 2021 | H5N8 | Cloacal  | 24.17 | Pos |     |     |
|     | #17.5 | Duck | 2021 | H5N8 | Tracheal | 19.26 | Pos |     |     |
|     | #17.6 | Duck | 2021 | H5N8 | Tracheal | 18.31 | Pos |     |     |
|     | #17.7 | Duck | 2021 | H5N8 | Tracheal | 21.01 | Pos |     |     |
| #18 | #18.1 | Duck | 2021 | H5N8 | Tracheal | 20.46 | Pos | Pos | Pos |
|     | #18.2 | Duck | 2021 | H5N8 | Tracheal | 20.89 | Pos |     |     |

|     |       |      |      |      |          |       |     |     |     |
|-----|-------|------|------|------|----------|-------|-----|-----|-----|
|     | #18.3 | Duck | 2021 | H5N8 | Tracheal | 19.18 | Pos |     |     |
|     | #18.4 | Duck | 2021 | H5N8 | Tracheal | 22.59 | Pos |     |     |
|     | #18.5 | Duck | 2021 | H5N8 | Tracheal | 22.03 | Pos |     |     |
| #19 | #19.1 | Duck | 2022 | H5N1 | Tracheal | 22.66 | Pos | Pos | Pos |
|     | #19.2 | Duck | 2022 | H5N1 | Tracheal | 29.36 | Neg |     |     |
|     | #19.3 | Duck | 2022 | H5N1 | Tracheal | 27.85 | Pos |     |     |
|     | #19.4 | Duck | 2022 | H5N1 | Tracheal | 29.39 | Pos |     |     |
|     | #19.5 | Duck | 2022 | H5N1 | Tracheal | 31.02 | Neg |     |     |
| #20 | #20.1 | Duck | 2022 | H5N1 | Tracheal | 23.58 | Pos | Pos | Pos |
|     | #20.2 | Duck | 2022 | H5N1 | Tracheal | 26.97 | Pos |     |     |
|     | #20.3 | Duck | 2022 | H5N1 | Tracheal | 27.36 | Pos |     |     |
|     | #20.4 | Duck | 2022 | H5N1 | Tracheal | 26.19 | Pos |     |     |
|     | #20.5 | Duck | 2022 | H5N1 | Tracheal | -     | Neg |     |     |
|     | #20.6 | Duck | 2022 | H5N1 | Tracheal | 35.28 | Neg |     |     |
|     | #20.7 | Duck | 2022 | H5N1 | Tracheal | -     | Neg |     |     |
| #21 | #21.1 | Duck | 2022 | H5N1 | Tracheal | 27.51 | Pos | Pos | Pos |
|     | #21.2 | Duck | 2022 | H5N1 | Tracheal | 21.13 | Pos |     |     |
|     | #21.3 | Duck | 2022 | H5N1 | Tracheal | 25.46 | Pos |     |     |
|     | #21.4 | Duck | 2022 | H5N1 | Tracheal | 23.97 | Pos |     |     |
| #22 | #22   | Duck | 2022 | H5N1 | Tracheal | 28.65 | Pos | Pos | Pos |
| #23 | #23   | Duck | 2022 | H5N1 | Tracheal | 32.64 | Neg | Pos | Neg |

|     |       |         |      |      |          |       |     |     |     |
|-----|-------|---------|------|------|----------|-------|-----|-----|-----|
| #24 | #24.1 | Chicken | 2022 | H5N1 | Tracheal | -     | Neg | Neg | Neg |
|     | #24.2 | Chicken | 2022 | H5N1 | Tracheal | -     | Neg |     |     |
| #25 | #25.1 | Chicken | 2022 | H5N1 | Tracheal | 35.11 | Neg | Pos | Pos |
|     | #25.2 | Chicken | 2022 | H5N1 | Tracheal | 29.31 | Pos |     |     |
|     | #25.3 | Chicken | 2022 | H5N1 | Tracheal | 28.87 | Neg |     |     |
| #26 | #26.1 | Chicken | 2022 | H5N1 | Tracheal | 21.59 | Pos | Pos | Pos |
|     | #26.2 | Chicken | 2023 | H5N2 | Tracheal | 22.51 | Pos |     |     |
| #27 | #27.1 | Chicken | 2022 | H5N1 | Tracheal | 29.69 | Pos | Pos | Pos |
|     | #27.2 | Chicken | 2022 | H5N1 | Tracheal | 26.14 | Pos |     |     |
|     | #27.3 | Chicken | 2022 | H5N1 | Tracheal | -     | Neg |     |     |
|     | #27.4 | Chicken | 2022 | H5N1 | Tracheal | 28.38 | Pos |     |     |
|     | #27.5 | Chicken | 2022 | H5N1 | Tracheal | -     | Neg |     |     |
| #28 | #28.1 | Chicken | 2022 | H5N1 | Tracheal | -     | Neg | Pos | Pos |
|     | #28.2 | Duck    | 2022 | H5N1 | Tracheal | 22.95 | Pos |     |     |
|     | #28.3 | Duck    | 2022 | H5N1 | Tracheal | 20.19 | Pos |     |     |
|     | #28.4 | Duck    | 2022 | H5N1 | Tracheal | 18.70 | Pos |     |     |
|     | #28.5 | Duck    | 2022 | H5N1 | Tracheal | 21.09 | Pos |     |     |
| #29 | #29   | Chicken | 2022 | H5N1 | Tracheal | 18.07 | Pos | Pos | Pos |
| #30 | #30   | Chicken | 2022 | H5N1 | Tracheal | 15.14 | Pos | Pos | Pos |
| #31 | #31   | Chicken | 2022 | H5N1 | Tracheal | 31.95 | Neg | Pos | Neg |
| #32 | #32   | Chicken | 2022 | H5N1 | Tracheal | 36.03 | Pos | Pos | Pos |

|     |       |         |      |      |          |       |     |     |     |
|-----|-------|---------|------|------|----------|-------|-----|-----|-----|
| #33 | #33   | Chicken | 2022 | H5N1 | Tracheal | -     | Neg | Neg | Neg |
| #34 | #34   | Chicken | 2022 | H5N1 | Tracheal | 33.79 | Neg | Pos | Neg |
| #35 | #35.1 | Chicken | 2022 | H5N1 | Tracheal | 22.14 | Pos | Pos | Pos |
|     | #35.2 | Chicken | 2022 | H5N1 | Tracheal | 21.39 | Pos |     |     |
| #36 | #36.1 | Chicken | 2022 | H5N1 | Tracheal | 19.90 | Pos | Pos | Pos |
|     | #36.2 | Chicken | 2022 | H5N1 | Tracheal | 23.67 | Pos |     |     |
| #37 | #37.1 | Chicken | 2022 | H5N1 | Tracheal | 20.95 | Pos | Pos | Pos |
|     | #37.2 | Chicken | 2022 | H5N1 | Tracheal | 25.22 | Pos |     |     |
| #38 | #38   | Chicken | 2022 | H5N1 | Tracheal | 18.88 | Pos | Pos | Pos |
| #39 | #39   | Chicken | 2022 | H5N1 | Tracheal | 24.32 | Pos | Pos | Pos |
| #40 | #40.1 | Duck    | 2022 | H5N1 | Cloacal  | -     | Neg | Pos | Pos |
|     | #40.2 | Duck    | 2022 | H5N1 | Cloacal  | 26.61 | Pos |     |     |
|     | #40.3 | Duck    | 2022 | H5N1 | Tracheal | 33.98 | Pos |     |     |
|     | #40.4 | Duck    | 2022 | H5N1 | Tracheal | -     | Neg |     |     |
| #41 | #41   | Duck    | 2022 | H5N1 | Tracheal | 24.94 | Pos | Pos | Pos |
| #42 | #42.1 | Duck    | 2022 | H5N1 | Tracheal | 25.35 | Pos | Pos | Pos |
|     | #42.2 | Duck    | 2022 | H5N1 | Tracheal | 17.65 | Pos |     |     |
|     | #42.3 | Duck    | 2022 | H5N1 | Tracheal | 23.35 | Pos |     |     |
|     | #42.4 | Duck    | 2022 | H5N1 | Tracheal | 22.30 | Pos |     |     |
| #43 | #43.1 | Duck    | 2022 | H5N1 | Tracheal | 25.84 | Pos | Pos | Pos |
|     | #43.2 | Duck    | 2022 | H5N1 | Tracheal | 24.67 | Pos |     |     |

|     |       |         |      |      |          |       |     |     |     |
|-----|-------|---------|------|------|----------|-------|-----|-----|-----|
|     | #43.3 | Duck    | 2022 | H5N1 | Tracheal | 29.49 | Neg |     |     |
| #44 | #44.1 | Duck    | 2022 | H5N1 | Cloacal  | 22.53 | Pos | Pos | Pos |
|     | #44.2 | Duck    | 2022 | H5N1 | Cloacal  | 29.65 | Neg |     |     |
|     | #44.3 | Duck    | 2022 | H5N1 | Cloacal  | 29.46 | Pos |     |     |
|     | #44.4 | Duck    | 2022 | H5N1 | Cloacal  | 28.78 | Neg |     |     |
|     | #44.5 | Duck    | 2022 | H5N1 | Tracheal | 33.48 | Neg |     |     |
|     | #44.6 | Duck    | 2022 | H5N1 | Tracheal | -     | Neg |     |     |
|     | #44.7 | Duck    | 2022 | H5N1 | Tracheal | 28.60 | Neg |     |     |
| #45 | #45.1 | Chicken | 2022 | H5N1 | Cloacal  | 24.46 | Pos | Pos | Pos |
|     | #45.2 | Chicken | 2022 | H5N1 | Cloacal  | 25.19 | Pos |     |     |
|     | #45.3 | Chicken | 2022 | H5N1 | Cloacal  | 26.33 | Pos |     |     |
|     | #45.4 | Chicken | 2022 | H5N1 | Cloacal  | 27.86 | Pos |     |     |
|     | #45.5 | Chicken | 2022 | H5N1 | Tracheal | 23.00 | Pos |     |     |
|     | #45.6 | Chicken | 2022 | H5N1 | Tracheal | 24.98 | Pos |     |     |
|     | #45.7 | Chicken | 2022 | H5N1 | Tracheal | 23.59 | Pos |     |     |
|     | #45.8 | Chicken | 2022 | H5N1 | Tracheal | 27.28 | Pos |     |     |
| #46 | #46.1 | Duck    | 2022 | H5N1 | Cloacal  | 23.57 | Pos | Pos | Pos |
|     | #46.2 | Duck    | 2022 | H5N1 | Cloacal  | 23.22 | Pos |     |     |
|     | #46.3 | Duck    | 2022 | H5N1 | Cloacal  | 25.74 | Pos |     |     |
|     | #46.4 | Duck    | 2022 | H5N1 | Cloacal  | 21.88 | Pos |     |     |
|     | #46.5 | Duck    | 2022 | H5N1 | Cloacal  | 33.68 | Neg |     |     |



|     |       |      |      |      |          |       |     |     |     |
|-----|-------|------|------|------|----------|-------|-----|-----|-----|
|     | #46.6 | Duck | 2022 | H5N1 | Tracheal | 17.03 | Pos |     |     |
|     | #46.7 | Duck | 2022 | H5N1 | Tracheal | 16.01 | Pos |     |     |
|     | #46.8 | Duck | 2022 | H5N1 | Tracheal | 15.63 | Pos |     |     |
|     | #46.9 | Duck | 2022 | H5N1 | Tracheal | 17.03 | Pos |     |     |
| #47 | #47.1 | Duck | 2022 | H5N1 | Tracheal | 33.28 | Neg | Pos | Pos |
|     | #47.2 | Duck | 2022 | H5N1 | Tracheal | 31.12 | Neg |     |     |
|     | #47.3 | Duck | 2022 | H5N1 | Tracheal | 28.39 | Pos |     |     |
|     | #47.4 | Duck | 2022 | H5N1 | Tracheal | 28.29 | Pos |     |     |
|     | #47.5 | Duck | 2022 | H5N1 | Tracheal | 26.04 | Pos |     |     |
|     | #47.6 | Duck | 2022 | H5N1 | Tracheal | 26.22 | Pos |     |     |
| #48 | #48.1 | Duck | 2022 | H5N1 | Tracheal | 23.71 | Pos | Pos | Pos |
|     | #48.2 | Duck | 2022 | H5N1 | Tracheal | 22.55 | Pos |     |     |
|     | #48.3 | Duck | 2022 | H5N1 | Tracheal | 21.79 | Pos |     |     |
|     | #48.4 | Duck | 2022 | H5N1 | Tracheal | 23.85 | Pos |     |     |
| #49 | #49.1 | Duck | 2022 | H5N1 | Cloacal  | 23.08 | Pos | Pos | Pos |
|     | #49.2 | Duck | 2022 | H5N1 | Cloacal  | 25.39 | Pos |     |     |
|     | #49.3 | Duck | 2022 | H5N1 | Cloacal  | 27.47 | Pos |     |     |
|     | #49.4 | Duck | 2022 | H5N1 | Cloacal  | 23.48 | Pos |     |     |
|     | #49.5 | Duck | 2022 | H5N1 | Tracheal | 22.42 | Pos |     |     |
|     | #49.6 | Duck | 2022 | H5N1 | Tracheal | 22.74 | Pos |     |     |
|     | #49.7 | Duck | 2022 | H5N1 | Tracheal | 20.88 | Pos |     |     |

|     |       |       |      |      |          |       |     |     |     |
|-----|-------|-------|------|------|----------|-------|-----|-----|-----|
|     | #49.8 | Duck  | 2022 | H5N1 | Tracheal | 21.31 | Pos |     |     |
| #50 | #50.1 | Duck  | 2022 | H5N1 | Tracheal | 23.39 | Pos | Pos | Pos |
|     | #50.2 | Duck  | 2022 | H5N1 | Tracheal | 22.61 | Pos |     |     |
| #51 | #51.1 | Duck  | 2022 | H5N1 | Cloacal  | 26.55 | Pos | Pos | Pos |
|     | #51.2 | Duck  | 2022 | H5N1 | Cloacal  | 27.61 | Pos |     |     |
|     | #51.3 | Duck  | 2022 | H5N1 | Cloacal  | 26.16 | Pos |     |     |
|     | #51.4 | Duck  | 2022 | H5N1 | Cloacal  | 31.97 | Neg |     |     |
| #52 | #52.1 | Duck  | 2022 | H5N1 | Cloacal  | -     | Neg | Pos | Pos |
|     | #52.2 | Quail | 2022 | H5N1 | Cloacal  | -     | Neg |     |     |
|     | #52.3 | Quail | 2022 | H5N1 | Cloacal  | -     | Neg |     |     |
|     | #52.4 | Quail | 2022 | H5N1 | Cloacal  | -     | Neg |     |     |
|     | #52.5 | Quail | 2022 | H5N1 | Cloacal  | 21.58 | Pos |     |     |
|     | #52.6 | Quail | 2022 | H5N1 | Tracheal | -     | Neg |     |     |
|     | #52.7 | Quail | 2022 | H5N1 | Tracheal | 34.01 | Pos |     |     |
|     | #52.8 | Quail | 2022 | H5N1 | Tracheal | 34.35 | Neg |     |     |

358

359

360

361 **Supplementary Table 2:** Summary of the mismatches base number between the LAMP primers and  
 362 viral RNA.

363

| Primer            | F3 | B3 | FIP |    | BIP |    | LF | LB | Overall nucleotide identity % |
|-------------------|----|----|-----|----|-----|----|----|----|-------------------------------|
|                   |    |    | F1  | F2 | B1  | B2 |    |    |                               |
| Size              | 20 | 24 | 25  | 18 | 24  | 18 | 21 | 20 |                               |
| H5N8 HP 2015/2016 | 0  | 0  | 2   | 0  | 2   | 0  | 0  | 0  | 97,65                         |
| H5N8 HP 2020/2021 | 0  | 0  | 0   | 0  | 0   | 0  | 0  | 0  | 100                           |
| H5N8 HP 2021/2022 | 0  | 0  | 1   | 0  | 0   | 0  | 0  | 0  | 99,41                         |
| H5N9 HP           | 4  | 10 | 4   | 4  | 1   | 3  | 2  | 0  | 83,53                         |
| H5N3              | 4  | 9  | 4   | 4  | 1   | 3  | 2  | 0  | 84,12                         |
| H6N1              | 17 | 15 | 19  | 16 | 19  | 12 | 14 | 15 | 25,29                         |
| H7N1              | 16 | 15 | 18  | 11 | 19  | 9  | 14 | 15 | 31,18                         |
| H9N2              | 13 | 16 | 18  | 13 | 20  | 4  | 14 | 18 | 31,76                         |

364

365

366

367

368

369

370

371 **Supplementary Table 3:** HPAIV H5N8 2020/2021 and H5N1 2021/2022 RT-LAMP detection  
 372 sensitivity assay.

373

| Dilution number   |                                      | 1         | 2         | 3     | 4          | 5          | 6         | 7         | 8         | 9         | 10        | 11      |
|-------------------|--------------------------------------|-----------|-----------|-------|------------|------------|-----------|-----------|-----------|-----------|-----------|---------|
| H5N8<br>2020/2021 | rRT-PCR C <sub>t</sub>               | 20.8<br>1 | 22.44     | 24.53 | 26.5<br>8  | 28.38      | 30.7<br>6 | 31.5<br>4 | 33.2<br>1 | 34.4<br>6 | 36.0<br>1 | -       |
|                   | RT-qPCR<br>quantification<br>copy/μL | 3327<br>0 | 1176<br>0 | 3061  | 874.<br>4  | 214.3      | 86.5<br>6 | 18.4<br>4 | 0.94      | -         | -         | -       |
|                   | Colorimetric<br>detection            | Pos       | Pos       | Pos   | Pos        | Pos        | Pos       | Pos       | Neg       | Neg       | Neg       | Ne<br>g |
| H5N1<br>2021/2022 | rRT-PCR C <sub>t</sub>               | 21.6<br>4 | 23.01     | 25.40 | 27.3<br>6  | 29.27      | 31.6<br>2 | 33        | 35.3<br>0 | 36.9<br>1 |           |         |
|                   | RT-qPCR<br>quantification<br>copy/μL | 2532<br>0 | 7477      | 2424  | 665.<br>30 | 230.6<br>0 | 84.8<br>5 | 14.7<br>0 | 9.66      | -         | -         | -       |
|                   | Colorimetric<br>detection            | Pos       | Pos       | Pos   | Pos        | Pos        | Pos       | Neg       | Pos       | Neg       | Neg       | Ne<br>g |

374

375

376

377

378

379

380

381 **Supplementary Table 4:** Overview of the LAMP results in comparison to the rRT-PCR considered  
 382 as the gold standard.

| Virus subtypes       | Ct range   | Number of samples | True positive | True negative | False positive | False negative | Sensitivity | Specificity |
|----------------------|------------|-------------------|---------------|---------------|----------------|----------------|-------------|-------------|
| H5N8 HP<br>2020/2021 | Ct<25      | 59                | 59            | -             | -              | -              | 100%        | -           |
|                      | 25<Ct<30   | 13                | 12            | -             | -              | 1              | 92.31%      | -           |
|                      | Ct>30      | 9                 | 1             | 2             | -              | 6              | 14.29%      | 100%        |
|                      | All values | 81                | 72            | 2             | -              | 7              | 91.14%      | 100%        |
| H5N1 HP<br>2021/2022 | Ct<25      | 48                | 48            | -             | -              | -              | 100%        | -           |
|                      | 25<Ct<30   | 38                | 32            | -             | -              | 6              | 84.21%      | -           |
|                      | Ct>30      | 31                | 3             | 16            | -              | 12             | 20%         | 100%        |
|                      | All values | 117               | 83            | 16            | -              | 18             | 82.18%      | 100%        |
| H5N8<br>&<br>H5N1 HP | Ct<25      | 107               | 107           | -             | -              | -              | 100%        | -           |
|                      | 25<Ct<30   | 51                | 44            | -             | -              | 7              | 86.27%      | -           |
|                      | Ct>30      | 40                | 4             | 18            | -              | 18             | 18.18%      | 100%        |
|                      | All values | 198               | 155           | 18            | -              | 25             | 86.11%      | 100%        |

383
